# Supplementary material for: Antibacterial Activity of Chromomycins from a Marine-Derived Streptomyces microflavus
Source: PubMed Central journal article supplement (PMC7588889; doi:10.3390/md18100522), 2020-10-21
Supplement: marinedrugs-18-00522-s001.pdf [file marinedrugs-18-00522-s001.pdf]

*Supporting Information*

**Antibacterial Activity of Chromomycins from a Marine-Derived  
*Streptomyces microflavus***

**Eunji Cho <sup>1</sup>, Oh-Seok Kwon <sup>2</sup>, Beomkoo Chung <sup>1</sup>, Jayho Lee <sup>1</sup>, Jeongyoon Sun <sup>1</sup>, Jongheon Shin <sup>2,\*</sup>  
and Ki-Bong Oh <sup>1,\*</sup>**

<sup>1</sup> *Department of Agricultural Biotechnology, College of Agriculture and Life Sciences, Seoul National University, Seoul 08826, Korea*

<sup>2</sup> *Natural Products Research Institute, College of Pharmacy, Seoul National University, Seoul 08826, Korea*

## Contents

**Figure S1.** The  $^1\text{H}$  NMR (400 MHz, chloroform-*d*) spectrum of **1**

**Figure S2.** The  $^{13}\text{C}$  NMR (100 MHz, chloroform-*d*) spectrum of **1**

**Figure S3.** The COSY (400 MHz,  $\text{CDCl}_3$ ) spectrum of **1**

**Figure S4.** The TOCSY (400 MHz,  $\text{CDCl}_3$ ) spectrum of **1**

**Figure S5.** The eHSQC (400 MHz, chloroform-*d*) spectrum of **1**

**Figure S6.** The HMBC (400 MHz, chloroform-*d*) spectrum of **1**

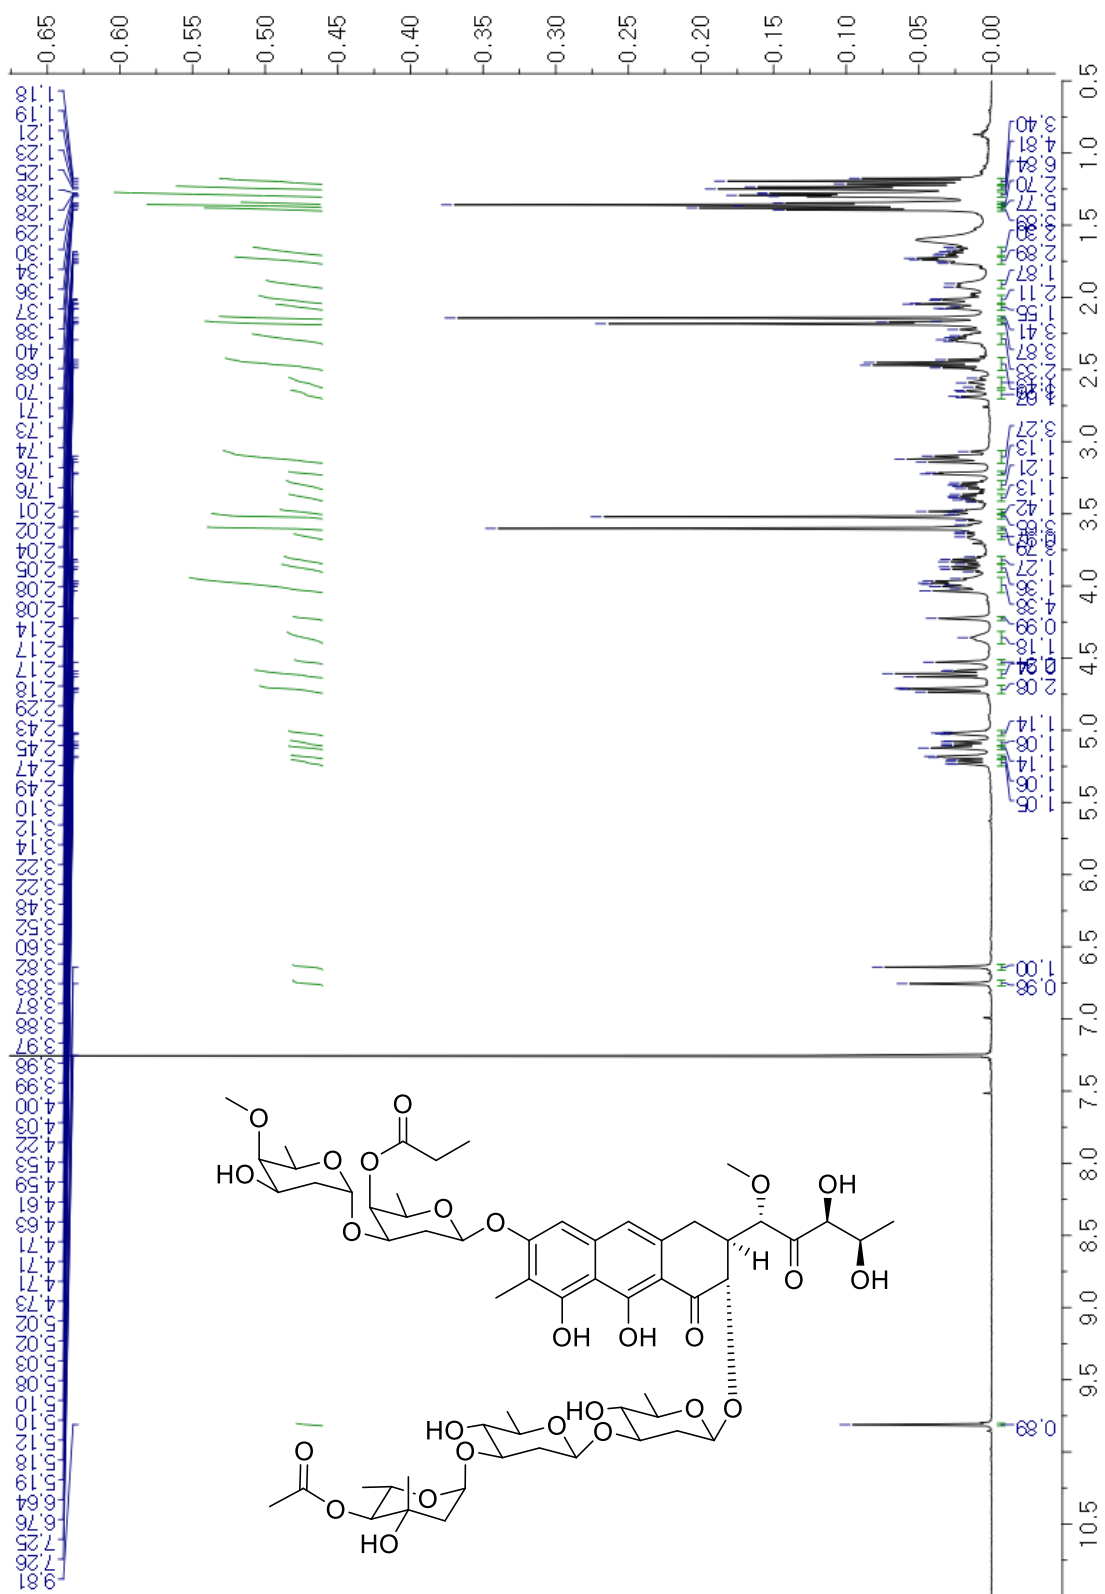

**Figure S1.** The  $^1\text{H}$  NMR (400 MHz, chloroform-*d*) spectrum of **1**

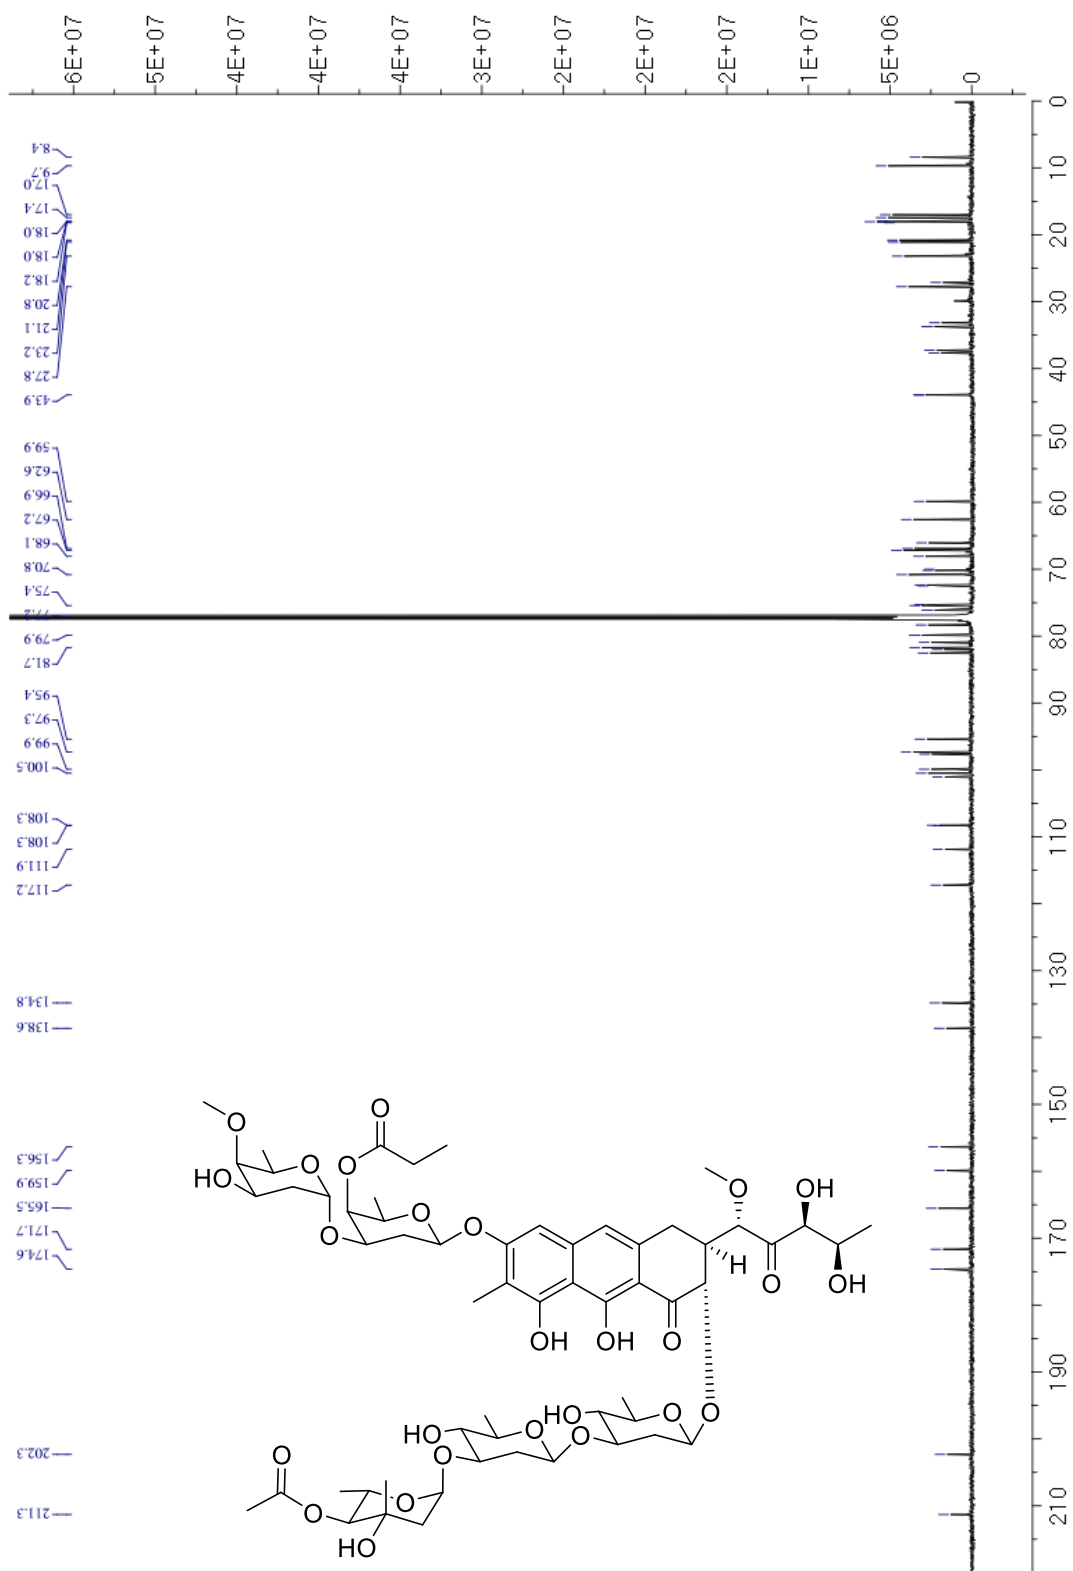

**Figure S2.** The  $^{13}\text{C}$  NMR (100 MHz, chloroform-*d*) spectrum of 1

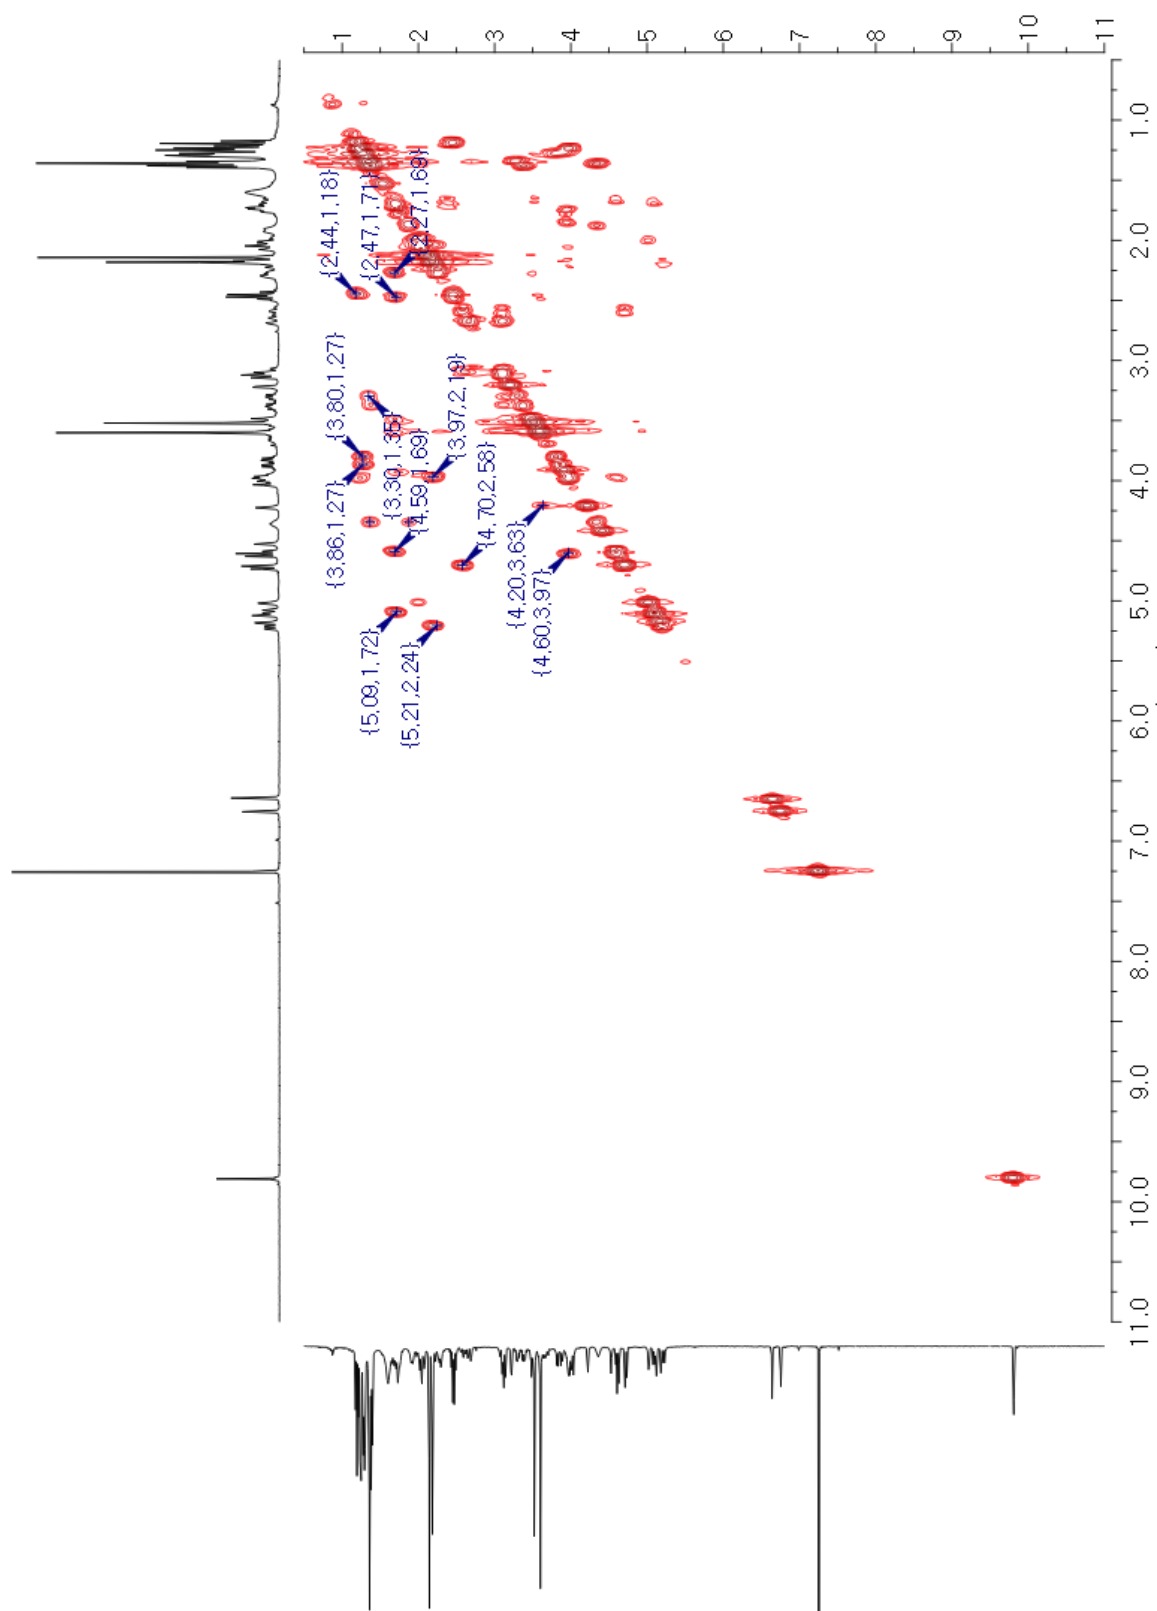

Figure S3. The COSY (400 MHz, CDCl<sub>3</sub>) spectrum of **1**

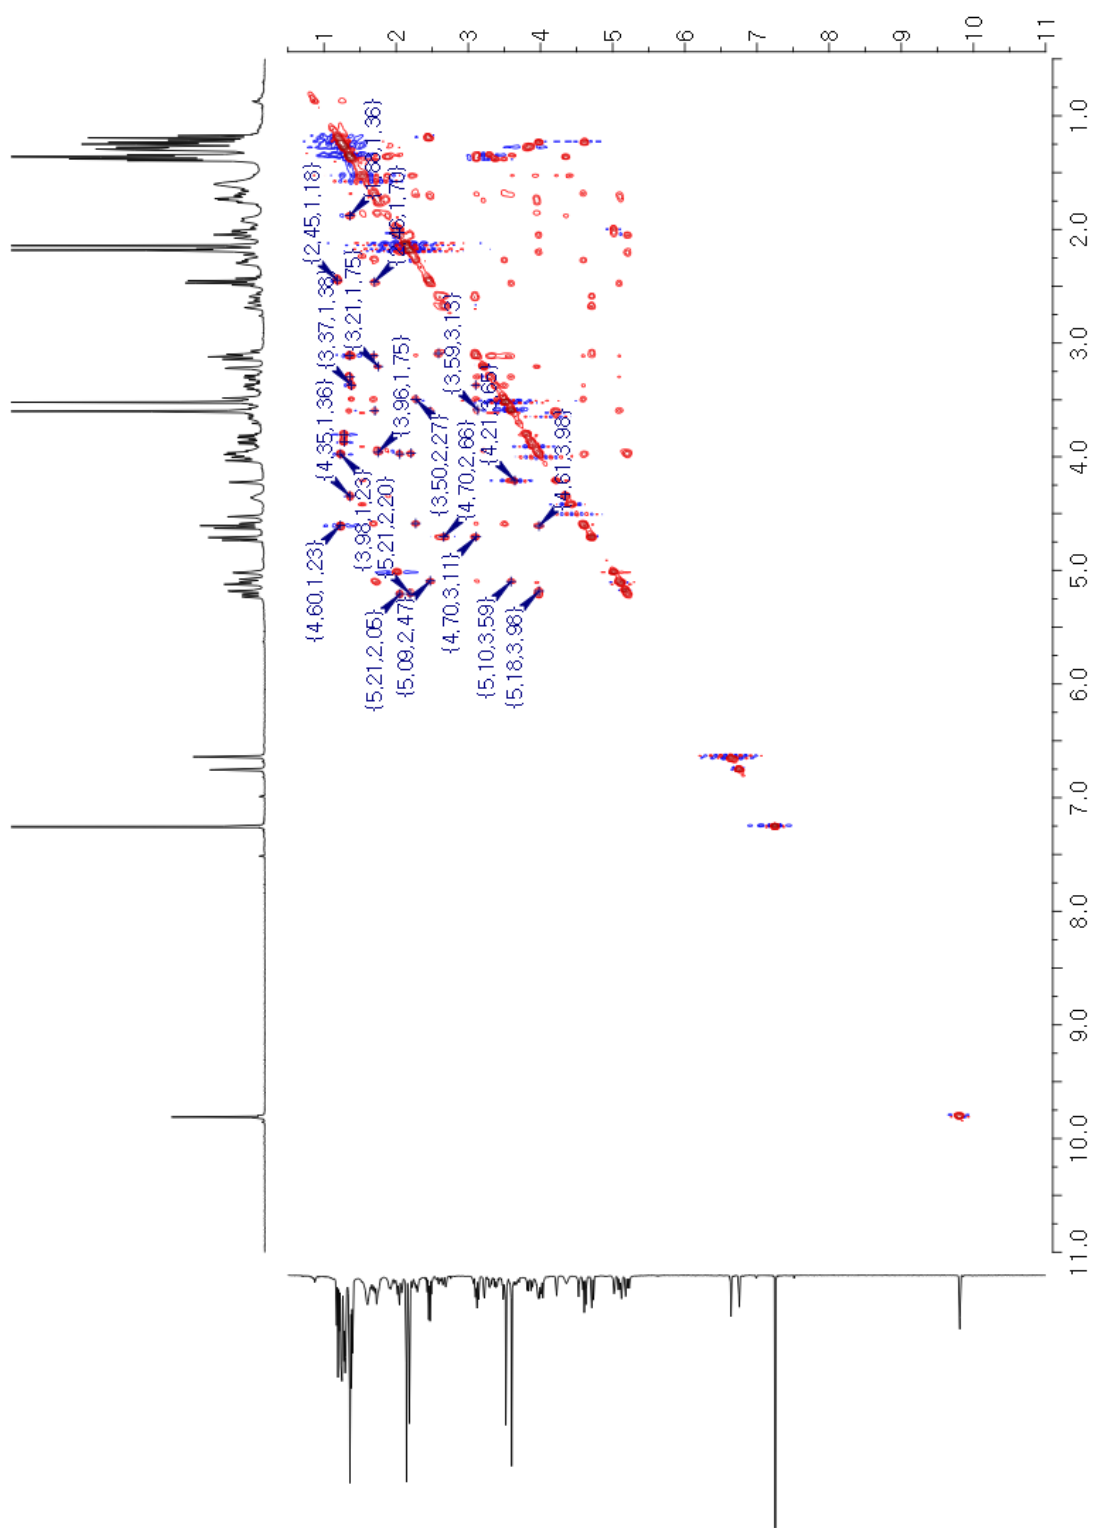

**Figure S4.** The TOCSY (400 MHz,  $\text{CDCl}_3$ ) spectrum of **1**

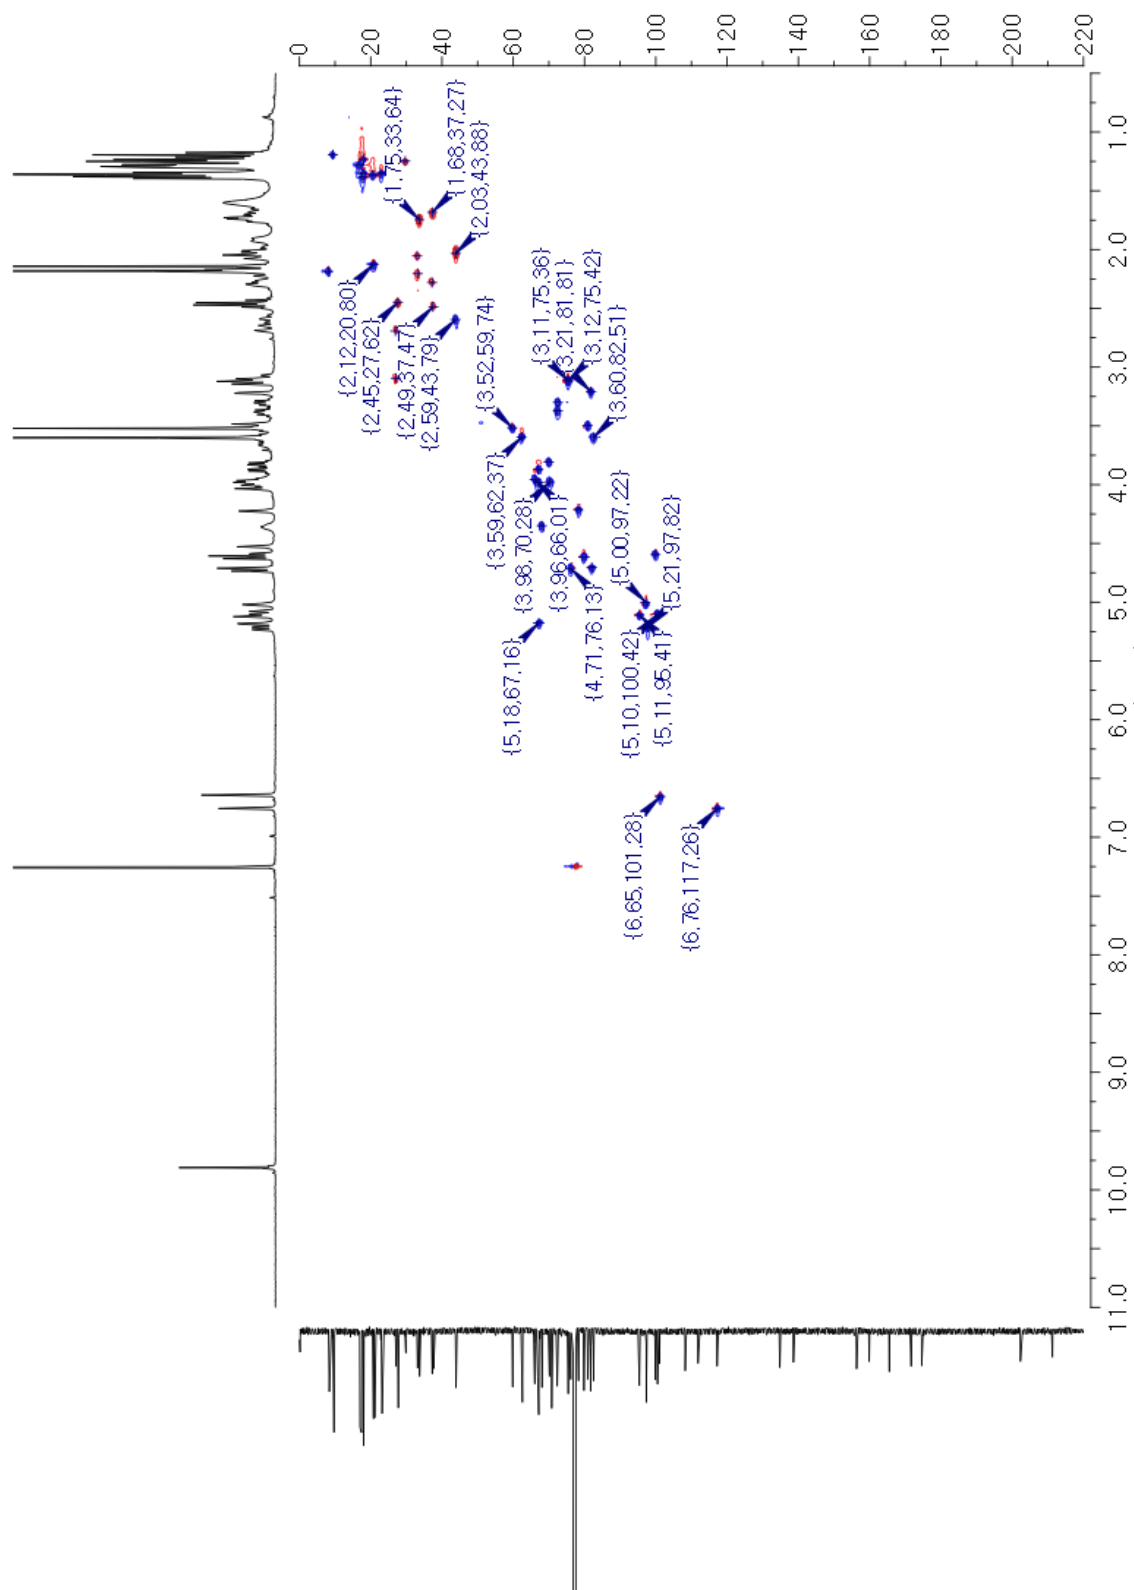

Figure S5. The eHSQC (400 MHz, chloroform-*d*) spectrum of 1

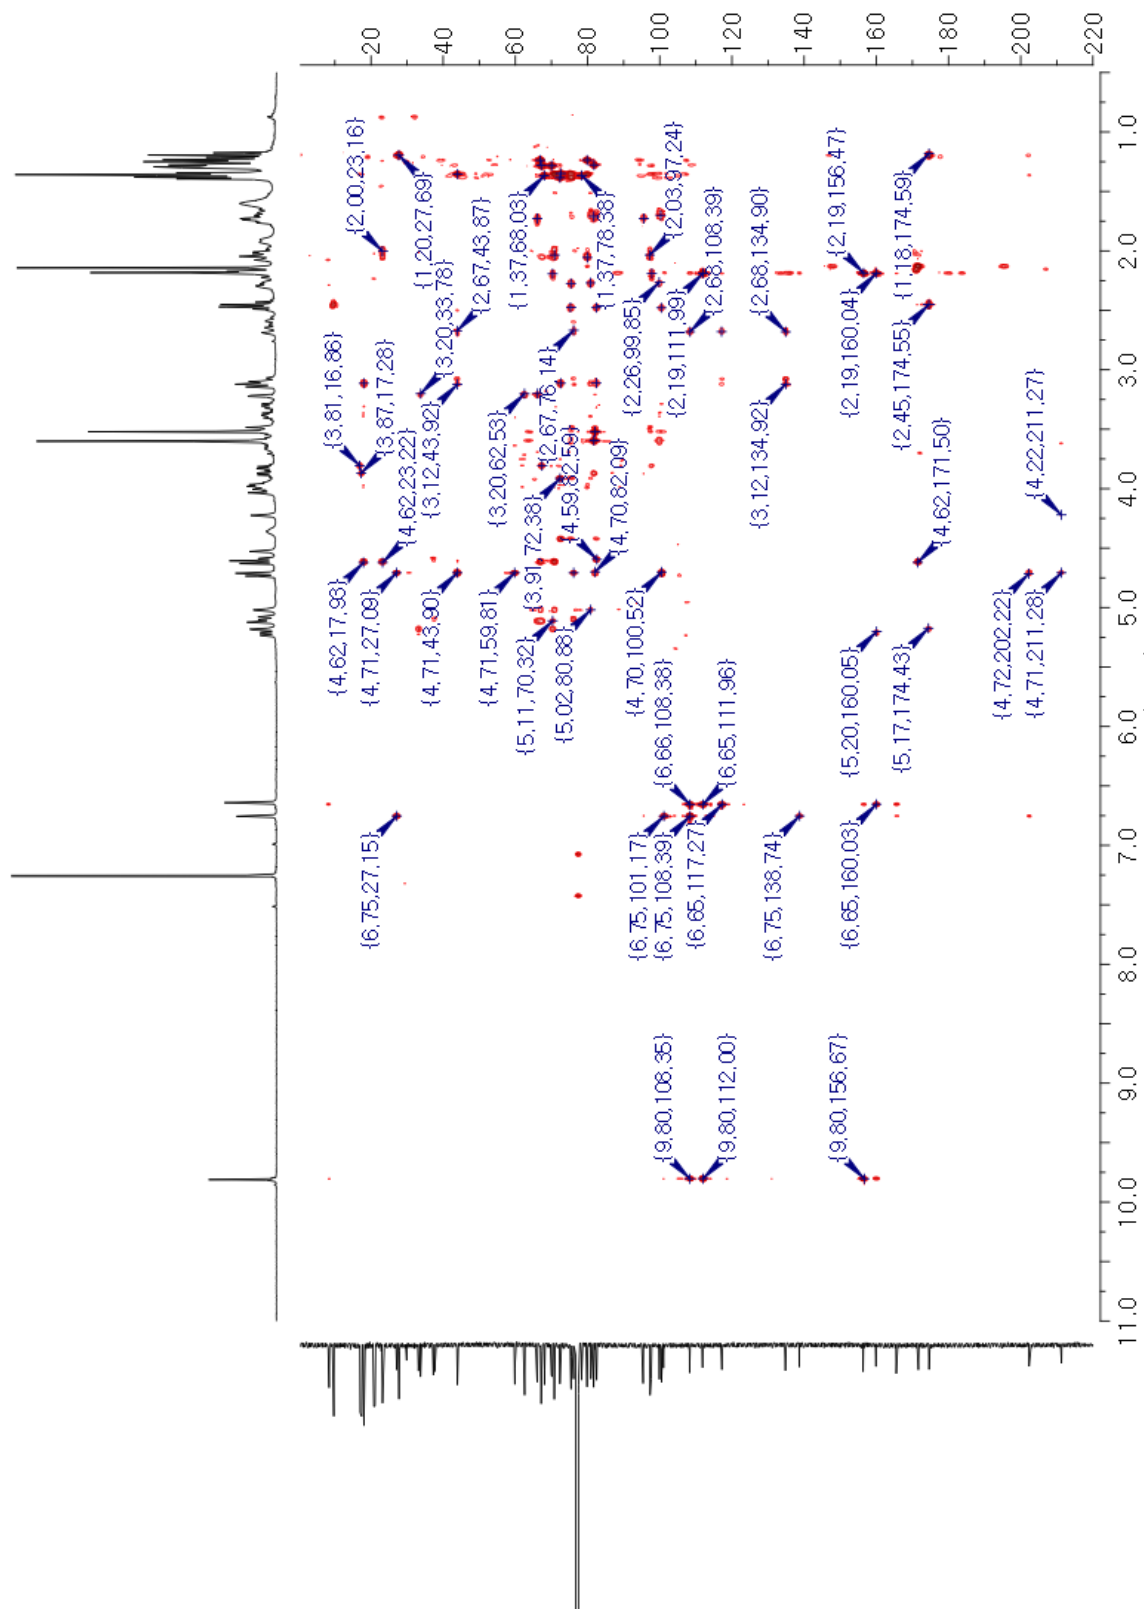

Figure S6. The HMBC (400 MHz, chloroform-*d*) spectrum of 1
